# Supplementary material for: Changes in Pregnancy-Associated Deaths in the US During the COVID-19 Pandemic in 2020
Source: PubMed Central journal article supplement (PMC9892955; doi:10.1001/jamanetworkopen.2022.54287), 2023-02-01
Supplement: jamanetwopen-e2254287-s001.pdf [file jamanetwopen-e2254287-s001.pdf]

## Supplementary Online Content

Margerison CE, Wang X, Gemmill A, Soldman-Mellor S. Changes in pregnancy-associated deaths in the US during the COVID-19 pandemic in 2020. *JAMA Netw Open*. 2023;6(2):e2254287. doi:10.1001/jamanetworkopen.2022.54287

**eTable.** *ICD-10* Codes Used to Define Pregnancy-Associated Deaths Due to Drug Overdose, Suicide, and Homicide

This supplementary material has been provided by the authors to give readers additional information about their work.

**eTable. ICD-10 Codes Used to Define Pregnancy-Associated Deaths Due to Drug Overdose, Suicide, and Homicide**

| Cause              | Description                                                                                                                                                                                                                                                                                                                                                                                                                                                                                                                                                    | Included ICD-10 codes                                                                                                                                                                                                                                                                                                                                                                                                                                                                |
|--------------------|----------------------------------------------------------------------------------------------------------------------------------------------------------------------------------------------------------------------------------------------------------------------------------------------------------------------------------------------------------------------------------------------------------------------------------------------------------------------------------------------------------------------------------------------------------------|--------------------------------------------------------------------------------------------------------------------------------------------------------------------------------------------------------------------------------------------------------------------------------------------------------------------------------------------------------------------------------------------------------------------------------------------------------------------------------------|
| Drug-related death | Comprises unintentional and undetermined-intent deaths due to drug poisoning, drug-induced diseases, and mental/behavioral disorders due to drugs. <sup>56</sup> Drug classes include opiates & narcotics, sedatives/hypnotics, stimulants, and other psychotropics. Category <i>excludes</i> deaths coded as suicides or homicides. We chose a broad definition of drug-related deaths to account for geographic and temporal variability in coroner/medical examiner coding practices, deaths involving multiple drugs, and drug availability and lethality. | X40-X44; Y10-Y14; D52.1, D59.0, D59.2, D61.1, D64.2, E06.4, E16.0, E23.1, E24.2, E27.3, E66.1, G21.1, G24.0, G25.1, G25.4, G25.6, G44.4, G62.0, G72.0, I95.2, J70.2-J70.4, K85.3, L10.5, L27.0, L27.1, M10.2, M32.0, M80.4, M81.4, M83.5, M87.1, R50.2; R78.1-R78.5; F11.0-F11.5, F11.7-F11.9, F12.0-F12.5, F12.7-F12.9, F13.0-F13.5, F13.7-F13.9, F14.0-F14.5, F14.7-F14.9, F15.0-F15.5, F15.7-F15.9, F16.0-F16.5, F16.7-F16.9, F18.0-F18.5, F18.7-F18.9, F19.0-F19.5, F19.7-F19.9. |
| Suicide            | Comprises all deaths with self-harm intent, including via poisoning, firearm, drowning, fire/flame, sharp/blunt object, jumping from high place, motor vehicle crash, suffocation, hanging, or other specified/unspecified means.                                                                                                                                                                                                                                                                                                                              | X60 to X84, Y87.0, or U03                                                                                                                                                                                                                                                                                                                                                                                                                                                            |
| Homicide           | Comprises all deaths caused by another person, including via firearm, object, pushing from high place or in front of moving object, motor vehicle, neglect/abandonment, or other means. Category includes homicide via poisoning from drugs, which is historically uncommon but is increasing.                                                                                                                                                                                                                                                                 | X85-Y09                                                                                                                                                                                                                                                                                                                                                                                                                                                                              |
