# Supplementary material for: Changes in Pregnancy-Associated Deaths in the US During the COVID-19 Pandemic in 2020
Source: PubMed Central journal article supplement (PMC9892955; doi:10.1001/jamanetworkopen.2022.54287), 2023-02-01
Supplement: jamanetwopen-e2254287-s002.pdf [file jamanetwopen-e2254287-s002.pdf]

## Data Sharing Statement

Margerison. Changes in Pregnancy-Associated Deaths in the US During the COVID-19 Pandemic in 2020. *JAMA Netw Open*. Published February 01, 2023.

doi:10.1001/jamanetworkopen.2022.54287

### Data

**Data available:** No

### Additional Information

**Explanation for why data not available:** The data that we used is obtained with a data use agreement from the National Center for Health Statistics, and we cannot share it publicly.
